# Supplementary material
Source: Springer Nature journal article supplement (https://www.springermedizin.de/resource/supplementary/12967_2013_1688_MOESM9_ESM.pdf/9574660)

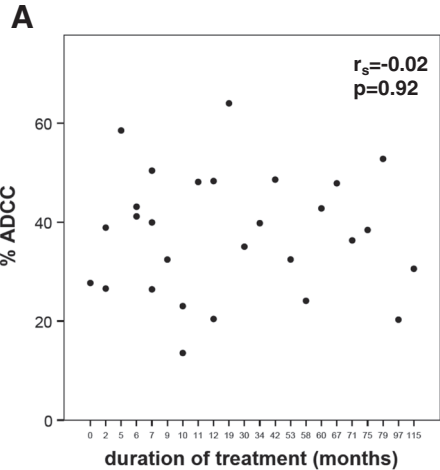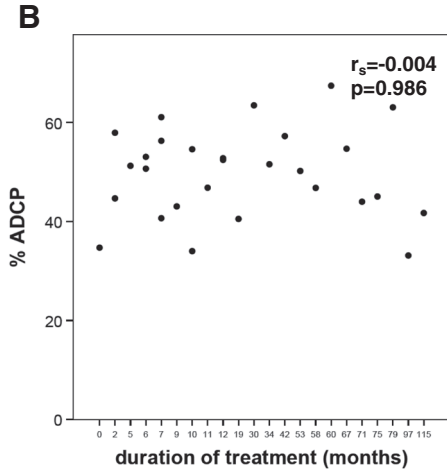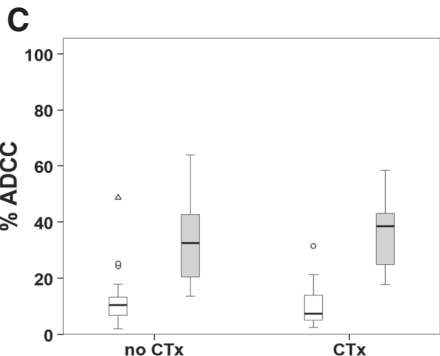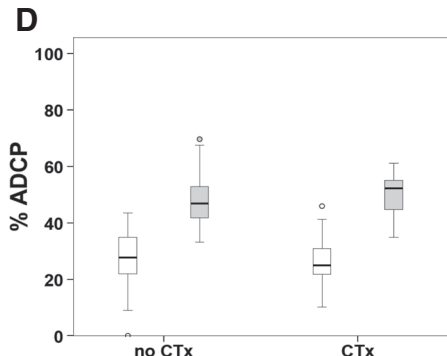

Supplement: MOESM9 [file 9574660]
